# Supplementary material for: A Novel Sphingomonas sp. Isolated from Argan Soil for the Polyhydroxybutyrate Production from Argan Seeds Waste
Source: MDPI journal article supplement (doi:10.3390/polym15030512), 2023-01-18
Supplement: s1 [file s1]

# Supplementary Materials

## A Novel *Sphingomonas* sp. Isolated from Argan Soil for the Polyhydroxybutyrate Production from Argan Seeds Waste

Amina Aragosa <sup>1,2</sup>, Benedetta Saccomanno <sup>1</sup>, Valeria Specchia <sup>1</sup> and Mariaenrica Frigione <sup>3,\*</sup>

<sup>1</sup> Department of Biological and Environmental Sciences and Technologies, University of Salento, 73100 Lecce, Italy

<sup>2</sup> School of Science and Engineering, Al Akhawayn University, Ifrane 53000, Morocco

<sup>3</sup> Department of Innovation Engineering, University of Salento, 73100 Lecce, Italy

\* Correspondence: mariaenrica.frigione@unisalento.it; Tel.: +39-0832-297215

| Score          | Expect                                                        | Identities   | Gaps      | Strand    |
|----------------|---------------------------------------------------------------|--------------|-----------|-----------|
| 1118 bits(605) | 0.0                                                           | 623/632(99%) | 0/632(0%) | Plus/Plus |
| Query 1        | ATGACTGCTAATACCGGATGATGACCTTAAGGCCAAAGATTTATCGCCCCGAGGATGAGCC | 60           |           |           |
| Sbjct 100      | ATGACTGCTAATACCGGATGATGACGTTAAGTCCAAAGATTTATCGCCCCGAGGATGAGCC | 159          |           |           |
| Query 61       | CGCGTAAGATTAGCTAGTTGGTGTGGTAAGAGCGCACCAAGGCGACGATGCTTAGCTGGT  | 120          |           |           |
| Sbjct 160      | CGCGTAGGATTAGCTAGTTGGTGTGGTAAGAGCGCACCAAGGCGACGATCCTTAGCTGGT  | 219          |           |           |
| Query 121      | CTGAGAGGATGATCAGCCCCACTGGGACTGAGACACGGCCCCAACTCCTACGGGAGGCAG  | 180          |           |           |
| Sbjct 220      | CTGAGAGGATGATCAGCCACACTGGGACTGAGACACGGCCCAGACTCCTACGGGAGGCAG  | 279          |           |           |
| Query 181      | CAGTGGGGAATATTGGACAATGGGCGAAAGCCTGATCCAGCAATGCCGCGTGAGTGATGA  | 240          |           |           |
| Sbjct 280      | CAGTGGGGAATATTGGACAATGGGCGAAAGCCTGATCCAGCAATGCCGCGTGAGTGATGA  | 339          |           |           |
| Query 241      | AGGCCTTAAGGTTGTAAAGCTCTTTTACCCGGGATGATAATGACAGTACCGGGAGAATAA  | 300          |           |           |
| Sbjct 340      | AGGCCTTAGGGTTGTAAAGCTCTTTTACCCGGGATGATAATGACAGTACCGGGAGAATAA  | 399          |           |           |
| Query 301      | GCTCCGGCTAACTCCGTGCCAGCAGCCGGGGTAATACGGAGGGAGCTAGCGTTGTTTCGGA | 360          |           |           |
| Sbjct 400      | GCTCCGGCTAACTCCGTGCCAGCAGCCGCGGTAATACGGAGGGAGCTAGCGTTGTTTCGGA | 459          |           |           |
| Query 361      | ATTACTGGGCGTAAAGCGCACGTAGGCGGCTTTGTAAGTTAGAGGTGAAAGCCTGGAGCT  | 420          |           |           |
| Sbjct 460      | ATTACTGGGCGTAAAGCGCACGTAGGCGGCTTTGTAAGTTAGAGGTGAAAGCCTGGAGCT  | 519          |           |           |
| Query 421      | CAACTCCAGAATTGCCTTTAAGACTGCATCGCTCGAATCCAGGAGAGGTGAGTGGAATTC  | 480          |           |           |
| Sbjct 520      | CAACTCCAGAATTGCCTTTAAGACTGCATCGCTCGAATCCAGGAGAGGTGAGTGGAATTC  | 579          |           |           |
| Query 481      | CGAGTGTAGAGGTGAAATTCGCAGATATTCGGAAGAACACCAAGTGGCGAAGGCGGCTCAC | 540          |           |           |
| Sbjct 580      | CGAGTGTAGAGGTGAAATTCGTAGATATTCGGAAGAACACCAAGTGGCGAAGGCGGCTCAC | 639          |           |           |
| Query 541      | TGGACTGGTATTGACGCTGAGGTGCGAAAGCGTGGGGAGCAAACAGGATTAGATACCCTG  | 600          |           |           |
| Sbjct 640      | TGGACTGGTATTGACGCTGAGGTGCGAAAGCGTGGGGAGCAAACAGGATTAGATACCCTG  | 699          |           |           |
| Query 601      | GTAGTCCACGCCGTAAACGATGATAACTAGCT                              | 632          |           |           |
| Sbjct 700      | GTAGTCCACGCCGTAAACGATGATAACTAGCT                              | 731          |           |           |

**Figure S1.** Alignment of 1b1 16S fragment (query) against *Sphingomonas dokdonensis* (sbjct), the best hit of BlastN output. Vertical lines indicate matching bases.
